# Supplementary material for: Identification and Expression Analysis of Long Non-coding RNA in Large Yellow Croaker (Larimichthys crocea) in Response to Cryptocaryon irritans Infection
Source: Front Genet. 2020 Nov 12;11:590475. doi: 10.3389/fgene.2020.590475 (PMC7689269; doi:10.3389/fgene.2020.590475)
Supplement: Supplementary Table 1 — Data collection. [file Table_1.XLSX]

## Sheet: dataset
Supplementary Table 1: Data collection
Run	BioProject	GBases	published	Tissue	development stage	treatment
SRR7699539	PRJNA486203	5.9	2018-08-16	muscle	juvenile fish
SRR7699536	PRJNA486203	6.3	2018-08-16	muscle	juvenile fish
SRR7699537	PRJNA486203	6.6	2018-08-16	muscle	juvenile fish
SRR7699538	PRJNA486203	6.6	2018-08-16	muscle	juvenile fish
SRR7699540	PRJNA486203	7.5	2018-08-16	muscle	juvenile fish
SRR7699541	PRJNA486203	6.5	2018-08-16	muscle	juvenile fish
SRR7699542	PRJNA486203	6.3	2018-08-16	muscle	juvenile fish
SRR7699543	PRJNA486203	5.8	2018-08-16	muscle	juvenile fish
SRR6474586	PRJNA368644	3.9	2018-01-15	gonad	2 years
SRR6474587	PRJNA368644	4.5	2018-01-15	gonad	2 years
SRR6474588	PRJNA368644	4.2	2018-01-15	gonad	2 years
SRR6474589	PRJNA368644	4.7	2018-01-15	gonad	2 years
SRR6474590	PRJNA368644	4.2	2018-01-15	gonad	2 years
SRR6474591	PRJNA368644	4.2	2018-01-15	gonad	2 years	pseudo-male
SRR6474592	PRJNA368644	3.7	2018-01-15	gonad	2 years	pseudo-male
SRR6474593	PRJNA368644	4.4	2018-01-15	gonad	2 years
SRR6474594	PRJNA368644	5.1	2018-01-15	gonad	2 years	pseudo-male
SRR6474595	PRJNA368644	4.7	2018-01-15	gonad	2 years
SRR6474596	PRJNA368644	4	2018-01-15	gonad	2 years
SRR5319849	PRJNA378130	4.9	2018-03-13	olfactory epithelium	3 months juvenile
SRR5121288	PRJNA357970	4.6	2017-03-19	embryo	pharyngula
SRR5121287	PRJNA357970	4.6	2017-03-19	embryo	gastrulation
SRR5121286	PRJNA357970	4.8	2017-03-19	embryo	1_cell_embryo
SRR5121204	PRJNA357970	4.9	2017-03-19	embryo	blastula
SRR5121203	PRJNA357970	5	2017-03-19	embryo	256_cell
SRR5121202	PRJNA357970	4.9	2017-03-19	embryo	16_cell_embryo
SRR5121194	PRJNA357970	4.6	2017-03-19	embryo	8_cell_embryo_L1
SRR5121193	PRJNA357970	4.7	2017-03-19	embryo	2_cell_embryo_L1
SRR3711298	PRJNA326556	5	2017-06-22	liver
SRR3711297	PRJNA326556	5.1	2017-06-22	liver
SRR2984346	PRJNA303096	3.1	2016-10-16	skin	0.5 year	fasting with 21 days
SRR2473991	PRJNA296537	5.3	2015-09-23	muscle		no treatment (normal feeding)
SRR2473990	PRJNA296537	6.6	2015-09-23	muscle		fasting with 21 days
SRR1964648	PRJNA280841	2.5	2015-09-08	Liver
SRR1964649	PRJNA280841	2.5	2015-09-08	Liver		cold stress treated with 12 h
SRR1964647	PRJNA280841	2.2	2015-09-08	Liver
SRR1964646	PRJNA280841	2.2	2015-09-08	Liver		thermal stress treated with 12 h
SRR1964644	PRJNA280841	2.3	2015-09-08	Liver
SRR1964645	PRJNA280841	2.3	2015-09-08	Liver		no treatment
SRR1964642	PRJNA280841	2.4	2015-09-08	Liver
SRR1964643	PRJNA280841	2.4	2015-09-08	Liver		48h hypoxia
SRR1284627	PRJNA246784	6.4	2015-07-22	brain		24h hypoxia
SRR1284626	PRJNA246784	6.5	2015-07-22	brain		12h hypoxia
SRR1284625	PRJNA246784	4.8	2015-07-22	brain		6h hypoxia
SRR1284624	PRJNA246784	4.5	2015-07-22	brain		3h hypoxia
SRR1284623	PRJNA246784	4.6	2015-07-22	brain		1h hypoxia
SRR1284622	PRJNA246784	4.5	2015-07-22	brain		0h hypoxia
SRR1284621	PRJNA246784	5.5	2015-07-22	brain
SRR2984355	PRJNA303096	3.5	2016-10-16	skin		stress_2h
SRR2984353	PRJNA303096	4	2016-10-16	skin		stress_2h
SRR2984352	PRJNA303096	4.3	2016-10-16	skin		stress_2h
SRR2984351	PRJNA303096	4.2	2016-10-16	skin		stress_0.5h
SRR2984350	PRJNA303096	3.8	2016-10-16	skin		stress_0.5h
SRR2984347	PRJNA303096	3.1	2016-10-16	skin		stress_0.5h
SRR5000825	PRJNA340054	5.5	2016-11-19	spleen		induced by trivalent bacterial vaccine 24h
SRR5000826	PRJNA340054	5.7	2016-11-19	spleen		induced by trivalent bacterial vaccine 72h
SRR5000824	PRJNA340054	5.5	2016-11-19	spleen		induced by trivalent bacterial vaccine 0h
SRR1145693	PRJNA236550	4.5	2015-07-22	spleen		viral mimic polyriboinosinic: polyribocytidylic acid (Poly I:C)
SRR2680669	PRJNA298994	3.7	2015-10-31	skin		Cryptocaryon irritans
SRR2680670	PRJNA298994	3.5	2015-10-31	skin
SRR8776455	PRJNA528855	28.9	2019-03-25	spleen		infected with clpV-RNAi strain of Pseudomonas plecoglossicida 2d
SRR8776456	PRJNA528855	35.8	2019-03-25	spleen		infected with clpV-RNAi strain of Pseudomonas plecoglossicida 2d
SRR8776457	PRJNA528855	27.7	2019-03-25	spleen		infected with clpV-RNAi strain of Pseudomonas plecoglossicida 2d
SRR8523630	PRJNA520739	32.2	2019-02-02	spleen		infected with fliA-RNAi strain of Pseudomonas plecoglossicida
SRR8523631	PRJNA520739	29.6	2019-02-02	spleen		infected with fliA-RNAi strain of Pseudomonas plecoglossicida
SRR8523632	PRJNA520739	33.5	2019-02-02	spleen		infected with fliA-RNAi strain of Pseudomonas plecoglossicida
SRR8416105	PRJNA513411	29.7	2019-01-08	spleen		wild-type strain of Pseudomonas plecoglossicida
SRR8416106	PRJNA513411	30.6	2019-01-08	spleen		wild-type strain of Pseudomonas plecoglossicida
SRR8416107	PRJNA513411	30.4	2019-01-08	spleen		wild-type strain of Pseudomonas plecoglossicida
SRR8416108	PRJNA513411	29.1	2019-01-08	spleen		wild-type strain of Pseudomonas plecoglossicida
SRR8416109	PRJNA513411	30.6	2019-01-08	spleen		wild-type strain of Pseudomonas plecoglossicida
SRR8416110	PRJNA513411	34.8	2019-01-08	spleen		wild-type strain of Pseudomonas plecoglossicida
SRR8416111	PRJNA513411	31.1	2019-01-08	spleen		wild-type strain of Pseudomonas plecoglossicida
SRR8416112	PRJNA513411	29.1	2019-01-08	spleen		wild-type strain of Pseudomonas plecoglossicida
SRR8416113	PRJNA513411	33.1	2019-01-08	spleen		wild-type strain of Pseudomonas plecoglossicida
SRR8416114	PRJNA513411	31.6	2019-01-08	spleen		wild-type strain of Pseudomonas plecoglossicida
SRR8416115	PRJNA513411	9.3	2019-01-08	spleen		wild-type strain of Pseudomonas plecoglossicida
SRR8416116	PRJNA513411	10.5	2019-01-08	spleen		wild-type strain of Pseudomonas plecoglossicida
SRR8416117	PRJNA513411	30.6	2019-01-08	spleen		wild-type strain of Pseudomonas plecoglossicida
SRR8416118	PRJNA513411	31.8	2019-01-08	spleen		wild-type strain of Pseudomonas plecoglossicida
SRR8416119	PRJNA513412	11.3	2019-01-08	spleen		wild-type strain of Pseudomonas plecoglossicida
SRR10811287	PRJNA597947	9.3	2020-02-02	skin		48h post-infection of Cryptocaryon irritans
SRR10811288	PRJNA597947	8	2020-02-02	skin		48h post-infection of Cryptocaryon irritans
SRR10811289	PRJNA597947	8.4	2020-02-02	skin		24h post-infection of Cryptocaryon irritans
SRR10811290	PRJNA597947	6.5	2020-02-02	skin		24h post-infection of Cryptocaryon irritans
SRR10811291	PRJNA597947	8.5	2020-02-02	skin		24h post-infection of Cryptocaryon irritans
SRR10811292	PRJNA597947	8.4	2020-02-02	skin		24h post-infection of Cryptocaryon irritans
SRR10811293	PRJNA597947	8.6	2020-02-02	skin		control group
SRR10811294	PRJNA597947	8	2020-02-02	skin		control group
SRR10811295	PRJNA597947	10.2	2020-02-02	skin		96h post-infection of Cryptocaryon irritans
SRR10811296	PRJNA597947	8.8	2020-02-02	skin		96h post-infection of Cryptocaryon irritans
SRR10811297	PRJNA597947	8.3	2020-02-02	skin		96h post-infection of Cryptocaryon irritans
SRR10811298	PRJNA597947	8	2020-02-02	skin		96h post-infection of Cryptocaryon irritans
SRR10811299	PRJNA597947	8.9	2020-02-02	skin		72h post-infection of Cryptocaryon irritans
SRR10811300	PRJNA597947	9.1	2020-02-02	skin		72h post-infection of Cryptocaryon irritans
SRR10811301	PRJNA597947	8.3	2020-02-02	skin		72h post-infection of Cryptocaryon irritans
SRR10811302	PRJNA597947	8	2020-02-02	skin		72h post-infection of Cryptocaryon irritans
SRR10811303	PRJNA597947	8.4	2020-02-02	skin		48h post-infection of Cryptocaryon irritans
SRR10811304	PRJNA597947	9.7	2020-02-02	skin		48h post-infection of Cryptocaryon irritans
SRR10811305	PRJNA597947	7.5	2020-02-02	skin		control group
SRR10811306	PRJNA597947	8.4	2020-02-02	skin		control group
